# Supplementary material
Source: PubMed Central journal article supplement (PMC5920725)

# Ly6C<sup>Hi</sup> Blood Monocyte/Macrophages Drive Chronic Inflammation and Impair Wound Healing in Diabetes

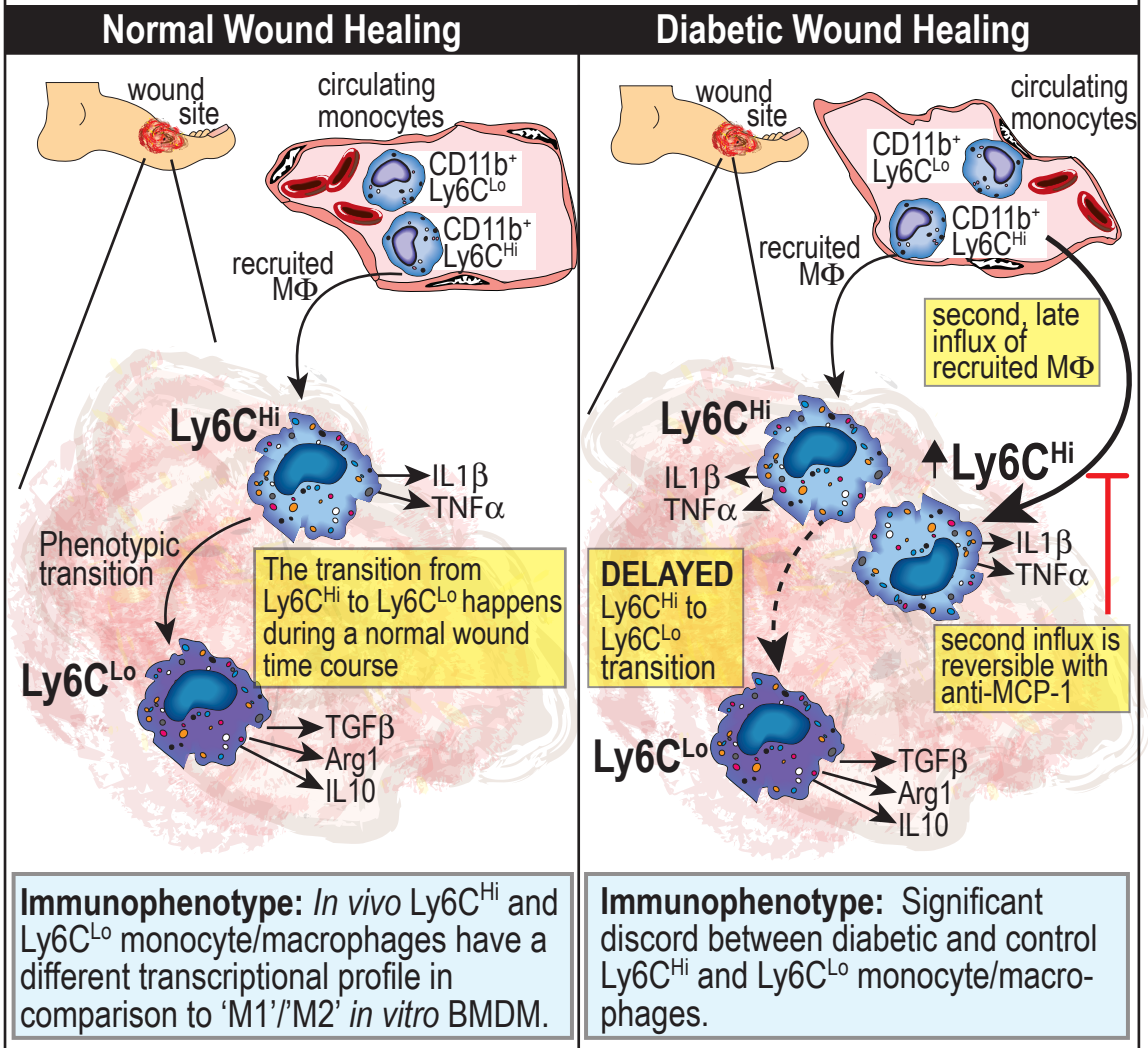

Supplement: NIHMS944203-supplement-Graphic_Abstract.pdf [file NIHMS944203-supplement-Graphic_Abstract.pdf]
