# Supplementary material
Source: PubMed Central journal article supplement (PMC5920725)
Supplement: NIHMS944203-supplement-Supplemental_Tables_and_Figures.pdf [file NIHMS944203-supplement-Supplemental_Tables_and_Figures.pdf]

# Supplemental Material

# Supplemental Fig I

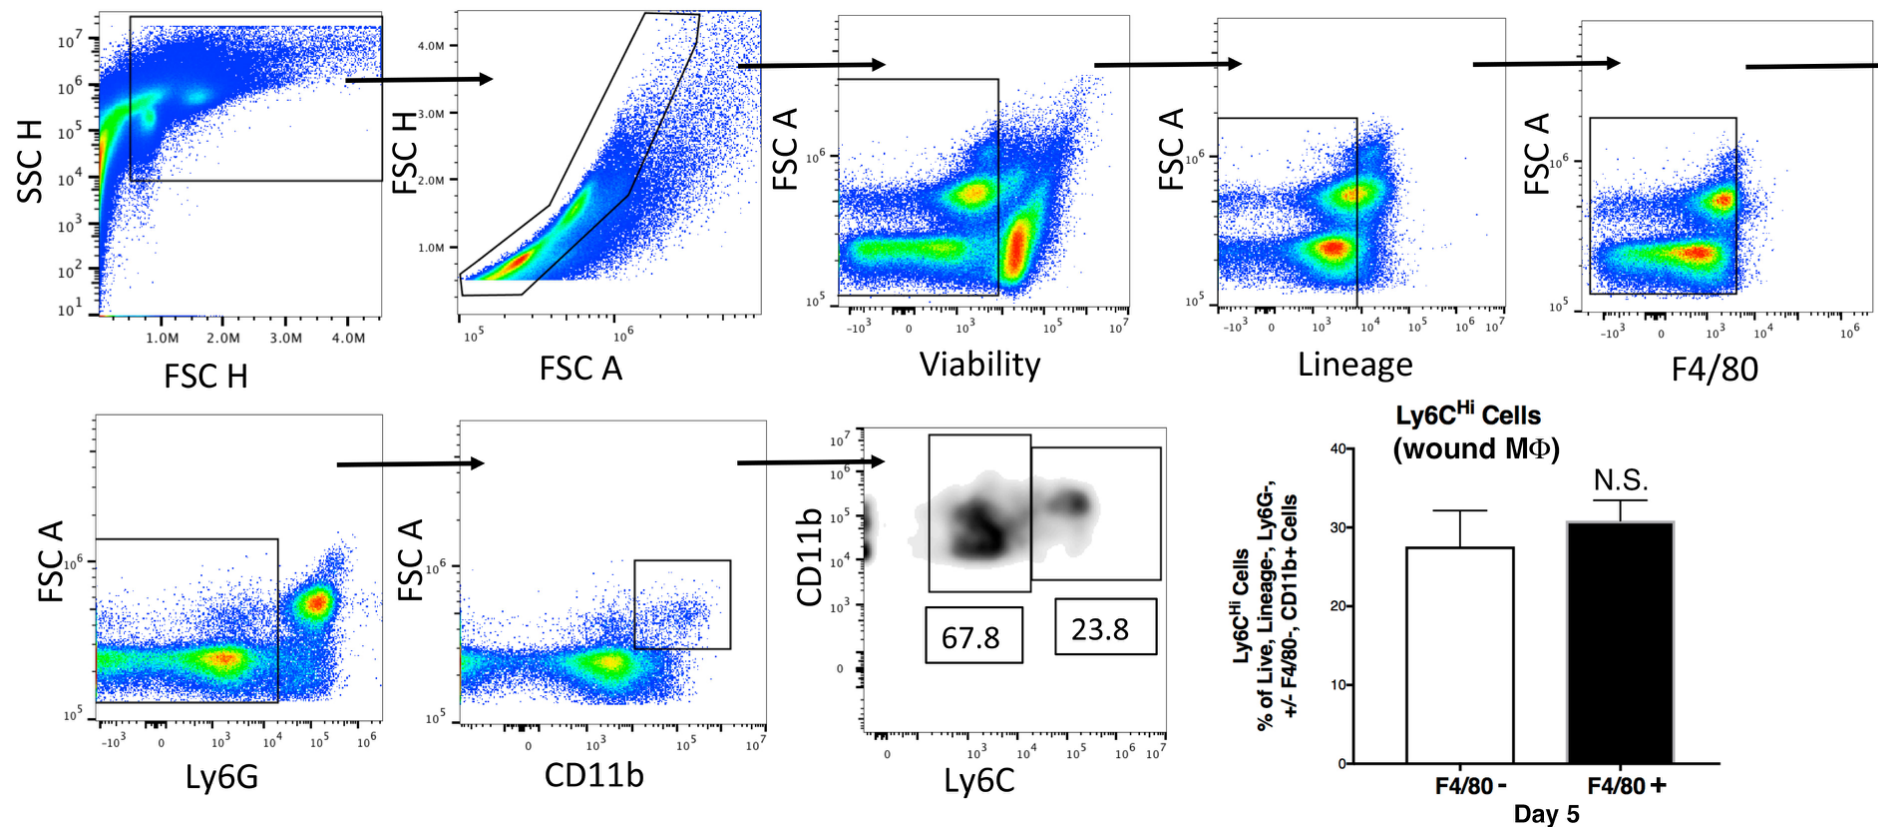

**Supplemental Figure I. Gating with wound resident macrophage marker F4/80<sup>+</sup> does not impact infiltrating CD11b<sup>+</sup>Ly6C<sup>Hi</sup> cell percentages in wounds.** Wounds were created using a 4mm punch biopsy on the back of male C57BL/6 mice. Wounds were harvested on day 5 post-injury and analyzed by flow cytometry. Gating strategy to select single, live, lin<sup>-</sup>, Ly6G<sup>-</sup>, CD11b<sup>+</sup>, Ly6C<sup>Hi</sup> cells and stratify based on F4/80<sup>+</sup> vs. F4/80<sup>-</sup>. (n =10 mice; tissues of 2 wounds per mouse were pooled for a single biological replicate. Data is representative of 2 independent experiments.) All data are expressed as the mean +/- the standard error of the means (SEM).

## Supplemental Fig II

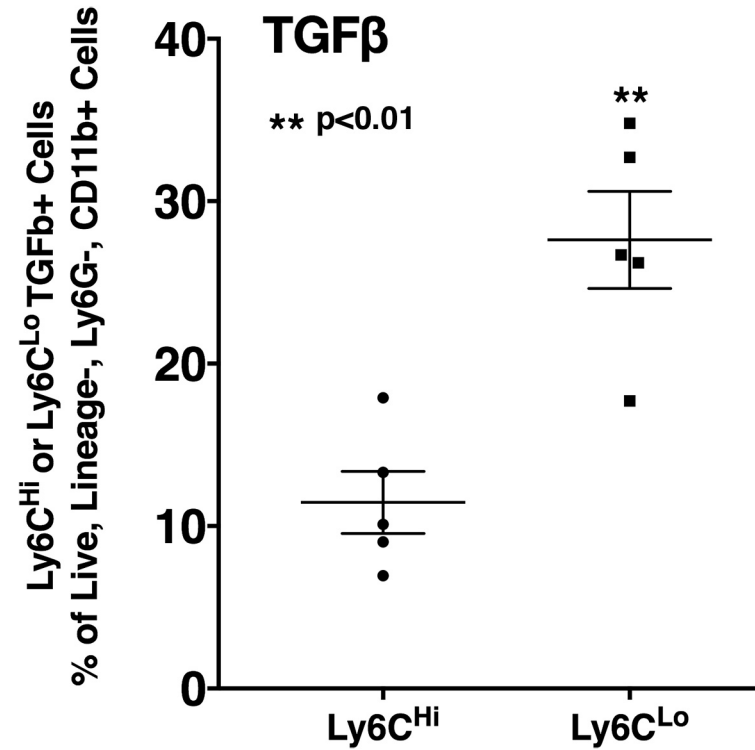

**Supplemental Figure II. Wound CD11b<sup>+</sup>Ly6C<sup>Lo</sup> monocyte/macrophages produce more TGFβ than wound CD11b<sup>+</sup>Ly6C<sup>Hi</sup> cells.** Wounds from C57BL/6 mice were collected on post-injury day 2 for cell isolation, *ex vivo* stimulation, and intra-cellular staining for flow cytometry. Percentage of single, live, lineage<sup>-</sup> [CD3, CD19, NK1.1, Ter-119]<sup>-</sup>, Ly6G<sup>-</sup>, CD11b<sup>+</sup>, Ly6C<sup>Hi</sup> and Ly6C<sup>Lo</sup> cells staining positive for TGFβ. (\*\*\*)  $p < 0.001$ ; n = 15 mice; tissues of 2 wounds per mouse were pooled for a single biological replicate. Data is representative of 3 independent experiments.) All data are expressed as mean +/- the standard error of the means (SEM).

## Supplemental Fig III

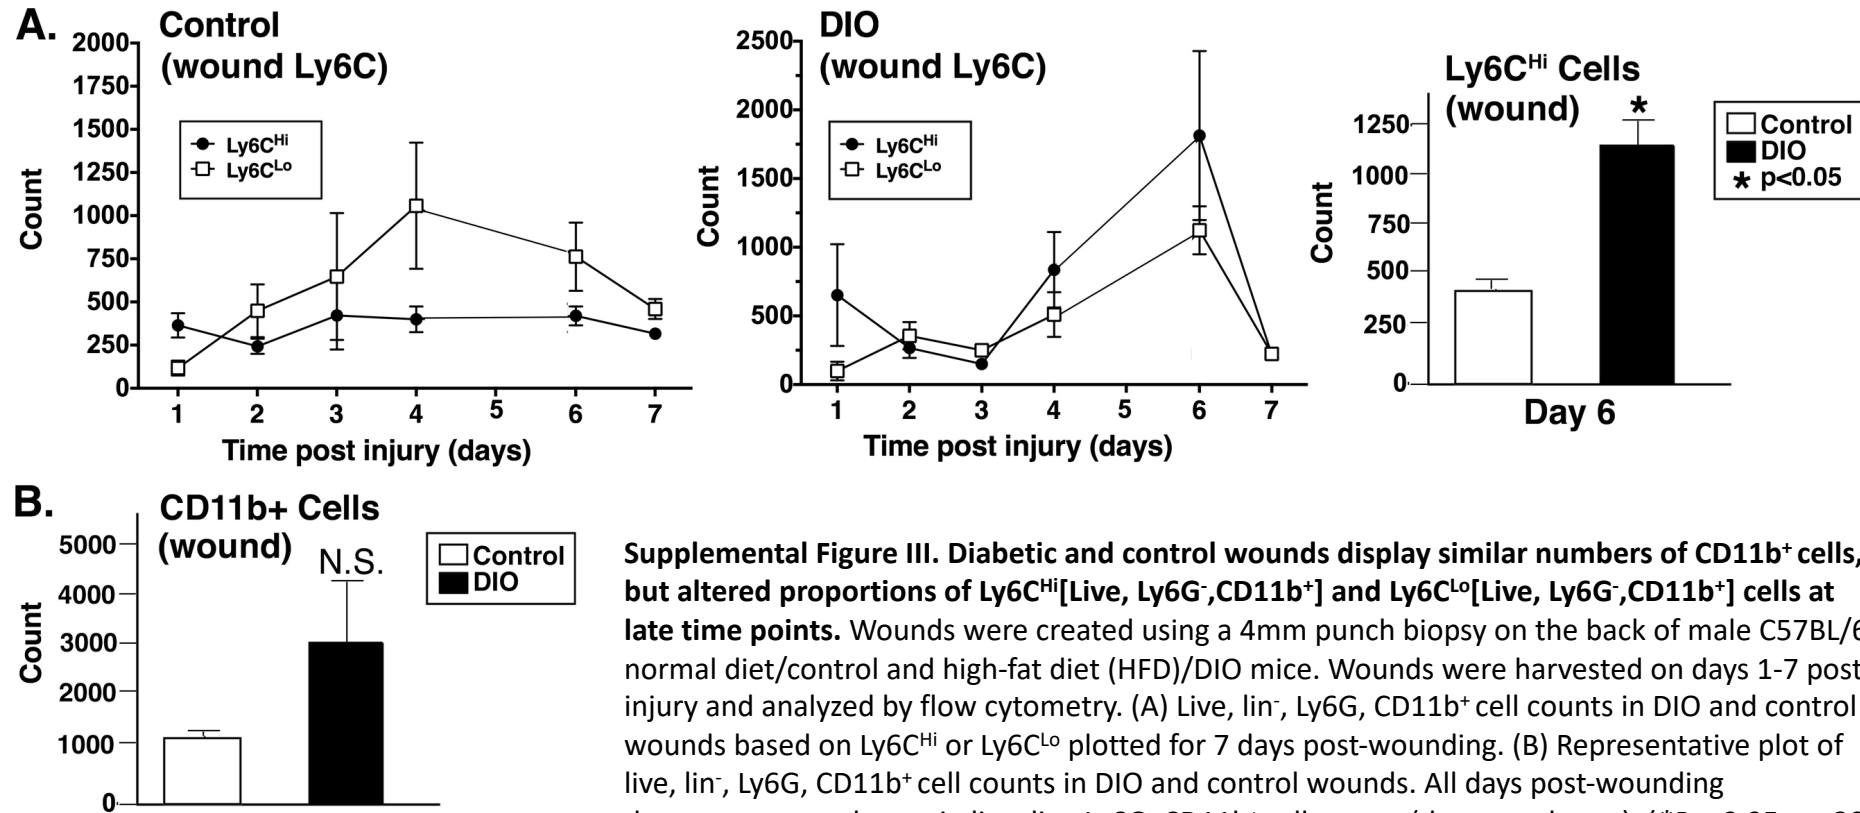

**Supplemental Figure III. Diabetic and control wounds display similar numbers of CD11b<sup>+</sup> cells, but altered proportions of Ly6C<sup>Hi</sup>[Live, Ly6G<sup>-</sup>,CD11b<sup>+</sup>] and Ly6C<sup>Lo</sup>[Live, Ly6G<sup>-</sup>,CD11b<sup>+</sup>] cells at late time points.** Wounds were created using a 4mm punch biopsy on the back of male C57BL/6 normal diet/control and high-fat diet (HFD)/DIO mice. Wounds were harvested on days 1-7 post-injury and analyzed by flow cytometry. (A) Live, lin<sup>-</sup>, Ly6G, CD11b<sup>+</sup> cell counts in DIO and control wounds based on Ly6C<sup>Hi</sup> or Ly6C<sup>Lo</sup> plotted for 7 days post-wounding. (B) Representative plot of live, lin<sup>-</sup>, Ly6G, CD11b<sup>+</sup> cell counts in DIO and control wounds. All days post-wounding demonstrate no change in live, lin<sup>-</sup>, Ly6G, CD11b<sup>+</sup> cell counts (data not shown). (\**P* < 0.05; n = 30 mice; tissues of 2 wounds per mouse were pooled for a single biological replicate. Data is representative of 3 independent experiments.) All data are expressed as the mean +/- the standard error of the means (SEM).

## Supplemental Fig IV

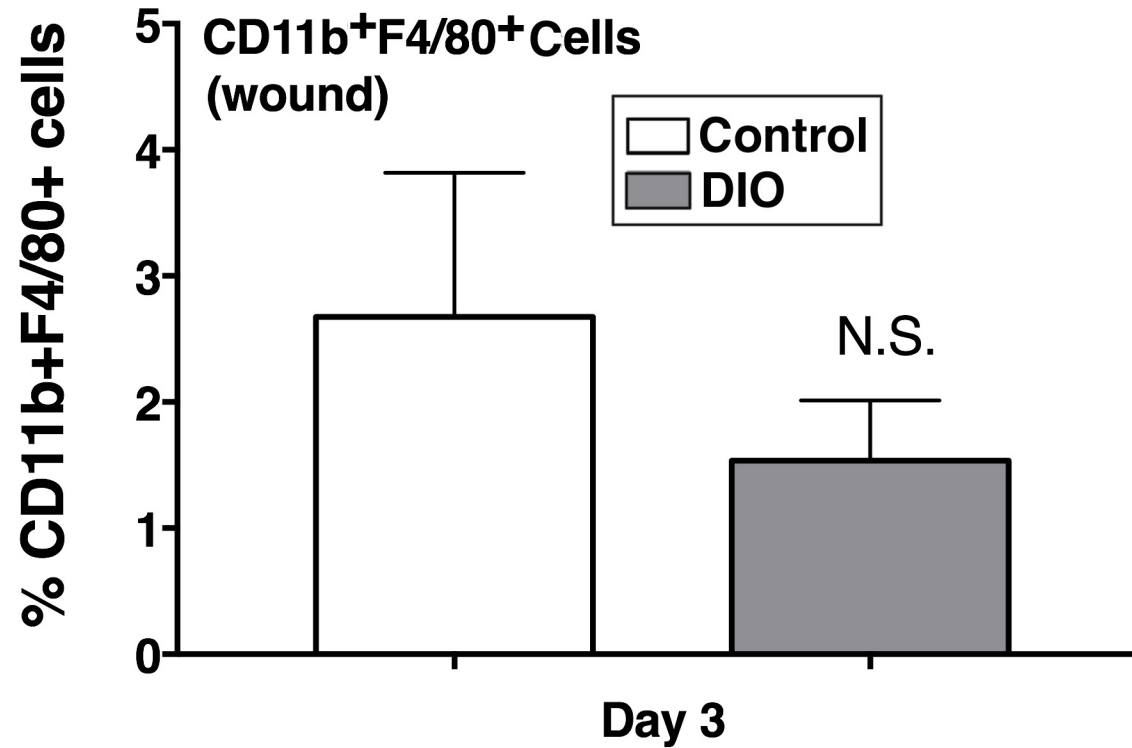

**Supplemental Figure IV. Percentage of wound resident macrophages (CD11b<sup>+</sup>/F4/80<sup>+</sup>) are similar between diabetic and control wounds.** Wounds were created using a 4mm punch biopsy on the back of male C57BL/6 normal diet/control and high-fat diet (HFD)/DIO mice. Wounds were harvested on day 3 post-injury and analyzed by flow cytometry. Gating strategy to select single, live, lin<sup>-</sup>,Ly6G<sup>-</sup>, CD11b<sup>+</sup>, F4/80<sup>+</sup> cells. (n =10 mice; tissues of 2 wounds per mouse were pooled for a single biological replicate. Data is representative of 3 independent experiments.) All data are expressed as the mean +/- the standard error of the means (SEM).

## Supplemental Fig V

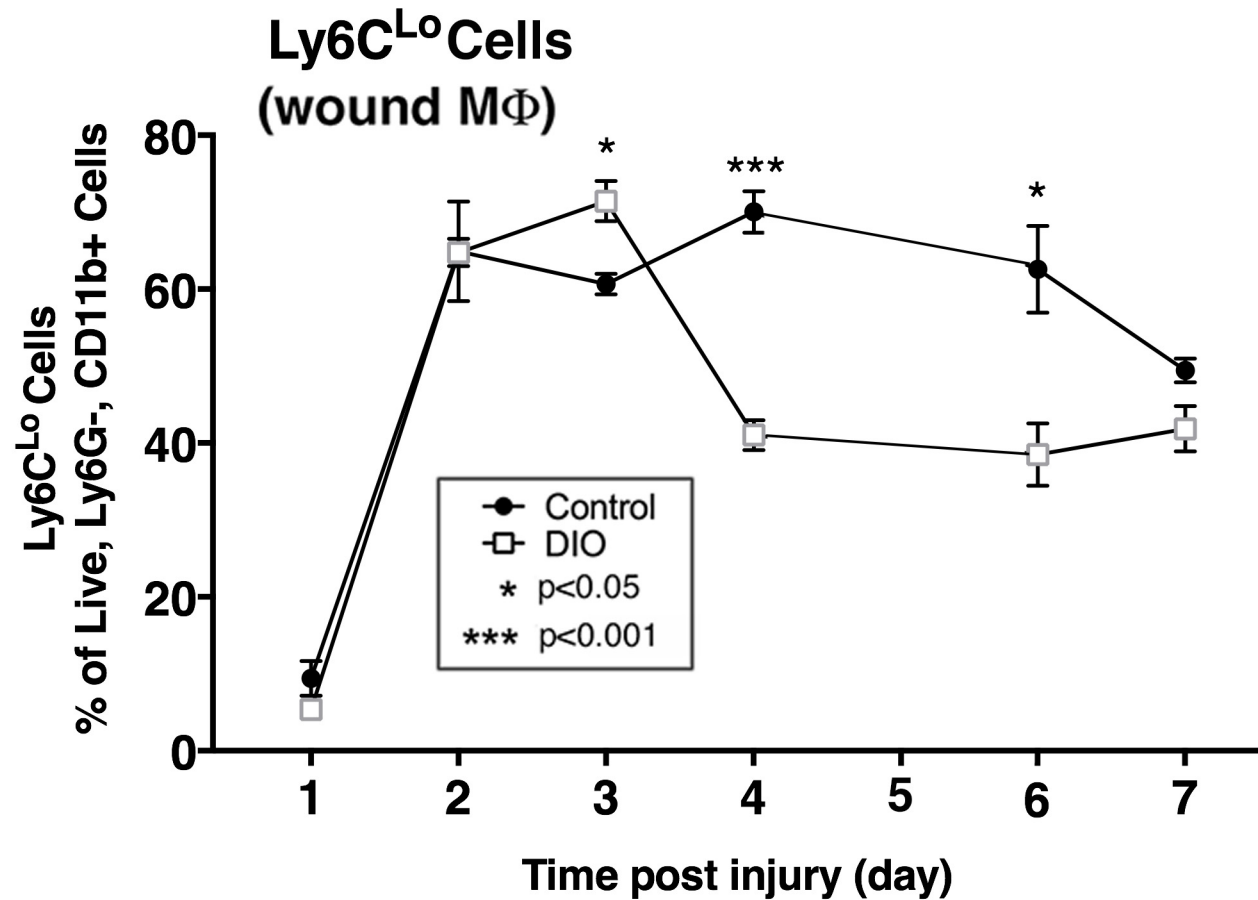

**Supplemental Figure V. Ly6C<sup>Lo</sup>[Live, Ly6G<sup>-</sup>,CD11b<sup>+</sup>] cells are increased at late time points in control compared to DIO wounds.** Wounds were created using a 4mm punch biopsy on the back of male C57BL/6 normal diet/control and high-fat diet (HFD)/DIO mice. Wounds were harvested on days 1-7 post-injury and analyzed by flow cytometry. The percentage of Ly6C<sup>Lo</sup>[Live, Ly6G<sup>-</sup>,CD11b<sup>+</sup>] cells in DIO and control wounds were plotted over time. (\*P < 0.05, \*\*\*P < 0.001; n = 30 mice; tissues of 2 wounds per mouse were pooled for a single biological replicate. Data is representative of 2 independent experiments.) All data are expressed as the mean +/- the standard error of the means (SEM).

## Supplemental Fig VI

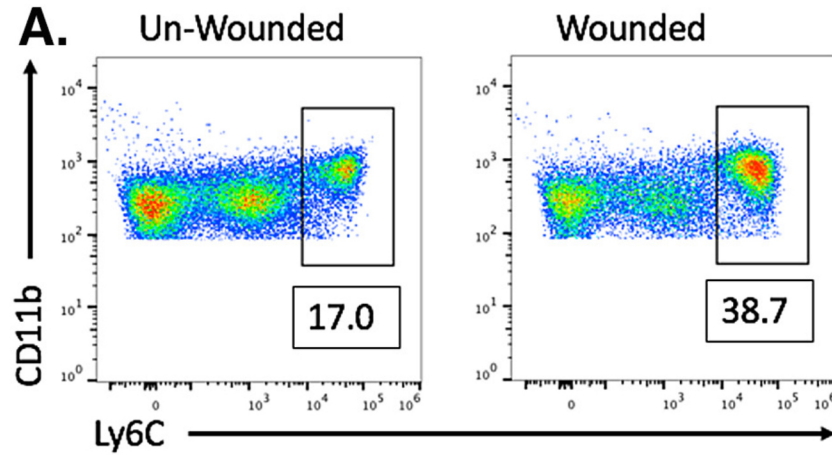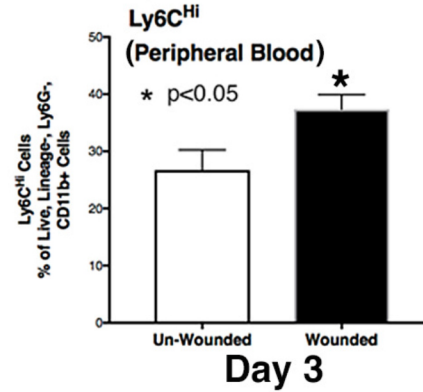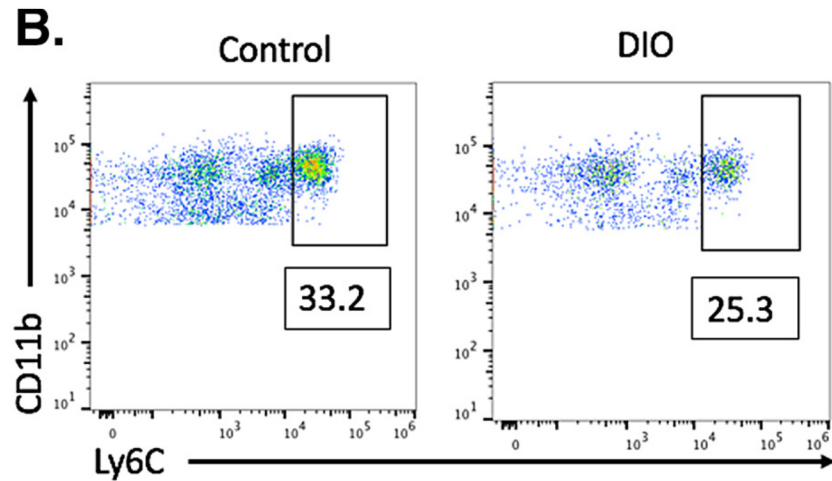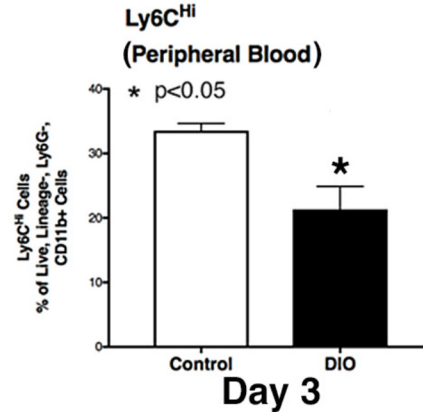

**Supplemental Figure VI. Peripheral blood Ly6C<sup>Hi</sup>[Lin<sup>-</sup>Ly6G<sup>-</sup>CD11b<sup>+</sup>] cells are decreased in diabetic mice during the inflammatory phase of healing.** C57BL/6 mice were either anesthetized alone or anesthetized and wounded and peripheral blood was collected on post-injury day 3 for flow cytometry. (A) Representative flow plots of peripheral blood Ly6C<sup>Hi</sup>[Lin<sup>-</sup>Ly6G<sup>-</sup>CD11b<sup>+</sup>] cells in wounded and un-wounded control mice on post-injury day 3 and comparison of percentage of CD11b<sup>+</sup> cells. C57BL/6 mice were fed high fat chow (60%kCal) for 12-16 weeks to induce obesity and insulin resistance/glucose intolerance in the diet-induced obese model (DIO) of physiologic type 2 diabetes. Peripheral blood was collected on post-injury day 3, to correspond with the second influx of Ly6C<sup>Hi</sup>[Lin<sup>-</sup>Ly6G<sup>-</sup>CD11b<sup>+</sup>] cells in DIO wounds, and analyzed by flow cytometry. (B) Representative flow plots and comparison of DIO and control Ly6C<sup>Hi</sup>[Lin<sup>-</sup>Ly6G<sup>-</sup>CD11b<sup>+</sup>] peripheral blood cells on day 3 (\*P < 0.05; n = 10 mice. Data is representative of 2 experiments). All data are expressed as mean +/- the standard error of the mean (SEM).

## Supplemental Fig VII

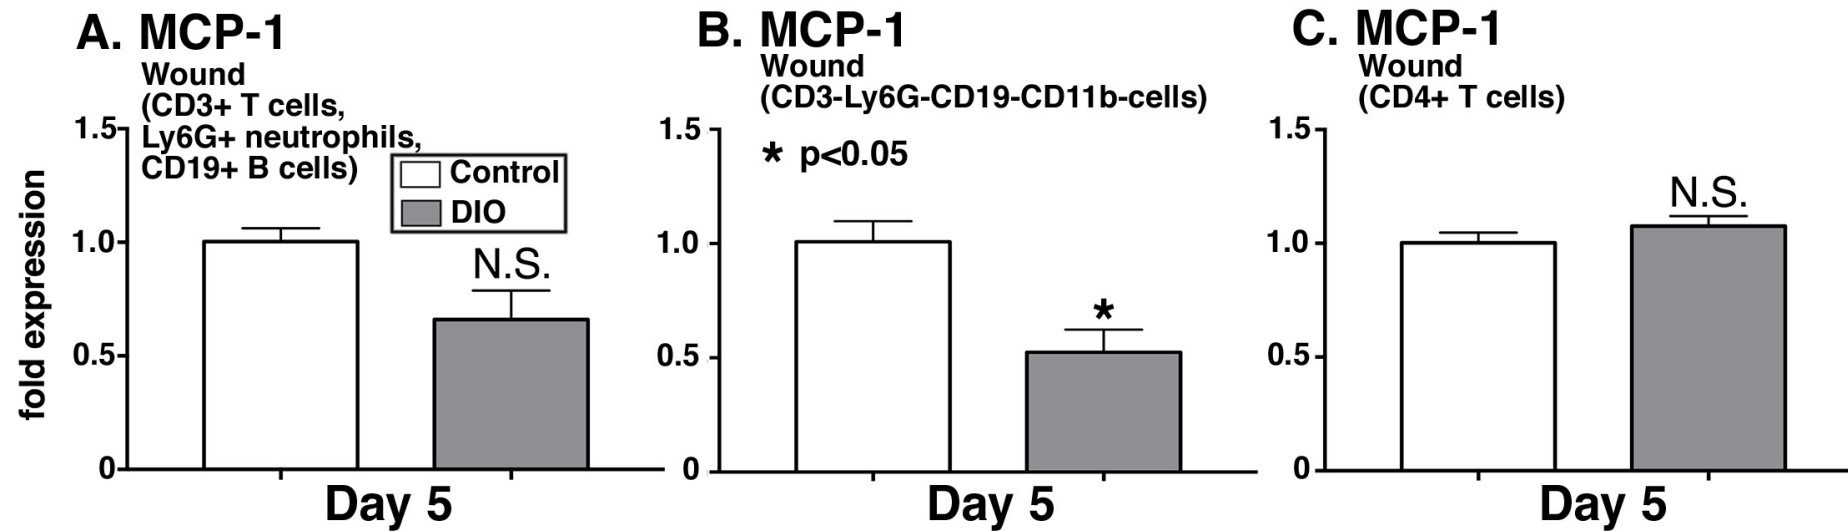

**Supplemental Figure VII. MCP-1 expression is similar in diabetic and control wound lymphocytes, neutrophils, T cells, B cells and structural cells.** C57BL/6 mice were fed high fat chow (60%kCal) for 12-16 weeks to induce obesity and insulin resistance/glucose intolerance in the diet-induced obese model (DIO) of physiologic type 2 diabetes. Wounds were harvested on day 5 and neutrophils (Ly6G+), lymphocytes (CD3+), T cells (CD4+), B cells (CD19+) and structural cells CD11b-CD3-CD19-Ly6G- were isolated using magnetic-activated cell sorting (MACs). MCP-1 gene expression was compared between DIO and control wound cells (n = 5, repeated one time). All data are expressed as mean +/- the standard error of the means (SEM).

## Supplemental Fig VIII

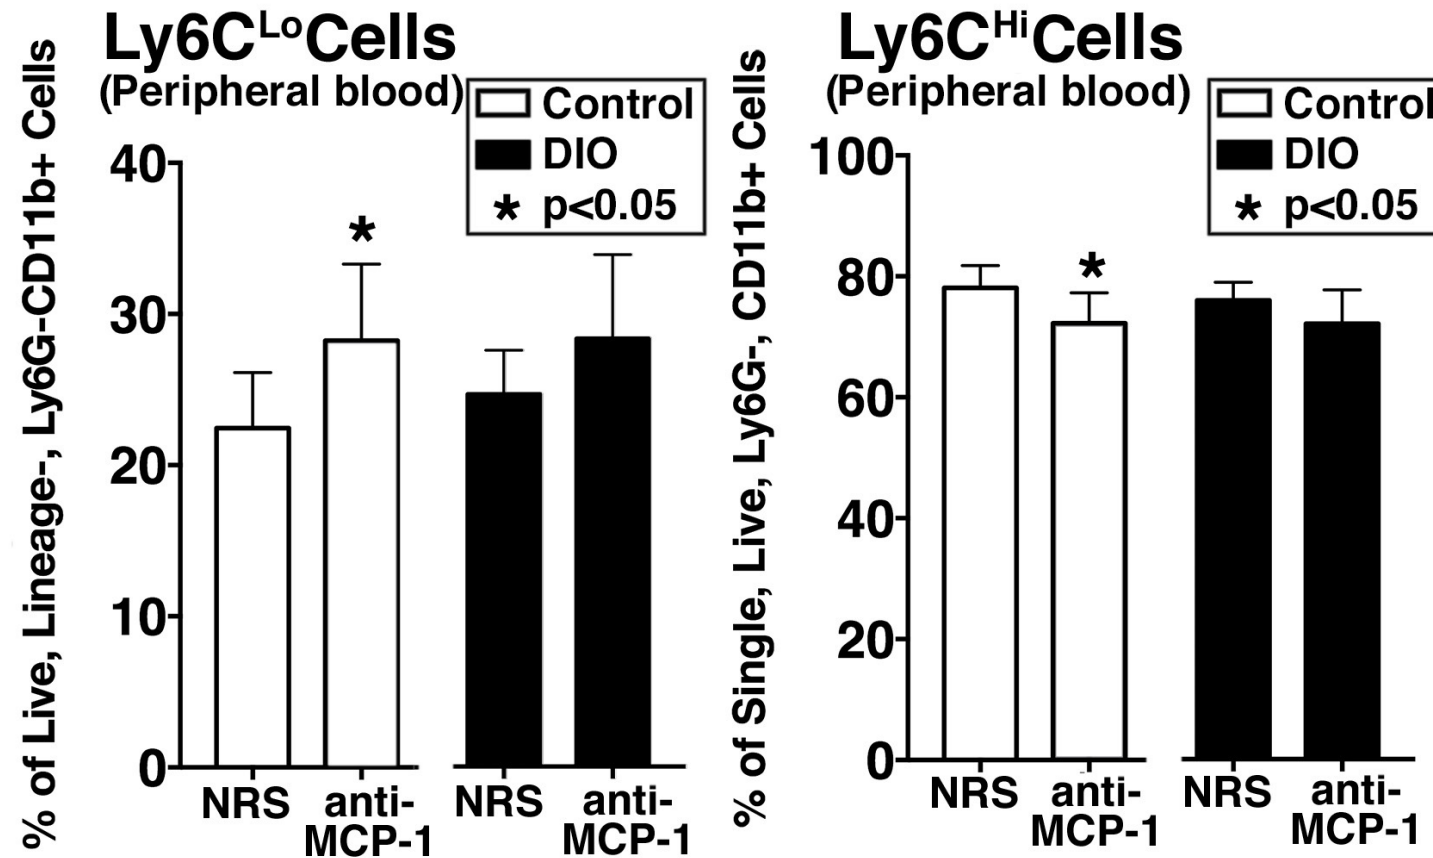

**Supplemental Figure VIII. Peripheral blood Ly6C<sup>Hi</sup>[Live, Ly6G<sup>-</sup>,CD11b<sup>+</sup>] cells are decreased and Ly6C<sup>Lo</sup>[Live, Ly6G<sup>-</sup>,CD11b<sup>+</sup>] cells increased following anti-MCP1 injection.** C57BL/6 mice were fed high fat chow (60%kCal) for 12-16 weeks to induce obesity and insulin resistance/glucose intolerance in the diet-induced obese model (DIO) of physiologic type 2 diabetes. Peripheral blood was collected on post-injury day 5, to correspond with the second influx of Ly6C<sup>Hi</sup>[Live, Ly6G<sup>-</sup>,CD11b<sup>+</sup>] cells in DIO wounds, and analyzed by flow cytometry. Ly6C<sup>Hi</sup>[Live, Ly6G<sup>-</sup>,CD11b<sup>+</sup>] and Ly6C<sup>Lo</sup>[Live, Ly6G<sup>-</sup>,CD11b<sup>+</sup>] peripheral blood cells were plotted in DIO and control mice on day 5 post-wounding. (\*P <0.05; n = 10 mice; tissues of 2 wounds per mouse were pooled for a single biological replicate. Data is representative of 2 independent experiments.) All data are expressed as mean +/- the standard error of the means (SEM).

# Supplemental Table I

## Major Resources Tables

### Animals

| Species/Strain                                                                 | Vendor or Source                      | Background Strain | Sex  |
|--------------------------------------------------------------------------------|---------------------------------------|-------------------|------|
| Wild-type                                                                      | Jackson Laboratory,<br>Bar Harbor, ME | C57BL/6           | Male |
| mT/mG mice<br>( <i>Gt(ROSA)26Sor<sup>tm4(ACTB-tdTomato,-EGFP)Lox/J</sup></i> ) | Jackson Laboratory,<br>Bar Harbor, ME | C57BL/6           | Male |

### Antibodies

| Target antigen    | Vendor or Source | Catalog #  | Working concentration |
|-------------------|------------------|------------|-----------------------|
| Anti-CD16/32      | BioXCell         | CUS-HB-197 | 1:200 dilution        |
| Anti-CD3          | Biolegend        | 100304     | 1:400 dilution        |
| Anti-CD19         | Biolegend        | 115504     | 1:400 dilution        |
| Anti-Ter-119      | Biolegend        | 116204     | 1:400 dilution        |
| Anti-NK1.1        | Biolegend        | 108704     | 1:400 dilution        |
| Anti-Ly6G         | Biolegend        | 127604     | 1:400 dilution        |
| Anti-CD11b        | Biolegend        | 101230     | 1:400 dilution        |
| Anti-Ly6C         | Biolegend        | 128035     | 1:400 dilution        |
| Anti-F4/80        | Biolegend        | 123121     | 1:400 dilution        |
| Streptavidin      | Biolegend        | 405208     | 1:1,000 dilution      |
| Anti-IL1 $\beta$  | eBioscience      | 25-7114-82 | 1:200 dilution        |
| Anti-TNF $\alpha$ | Biolegend        | 506308     | 1:200 dilution        |

### Supplemental Table I.

List of major experimental resources and associated vendors.

Supplemental Table II

| Ly6C <sup>Lo</sup> down in HFD |       |          |             |
|--------------------------------|-------|----------|-------------|
|                                | logFC | p value  | FDR         |
| Zfp963                         | 3.3   | 0.003256 | 0.999133332 |
| Hist1h2bb                      | 3.6   | 0.020722 | 1           |
| Col14a1                        | 3.7   | 0.059306 | 1           |
| 8030453O22Rik                  | 3.8   | 0.006858 | 1           |
| Gm42879                        | 3.8   | 0.003071 | 0.999133332 |
| Xlr                            | 4.0   | 0.004173 | 1           |
| Gm10643                        | 4.1   | 0.000839 | 0.498757072 |
| Kif20b                         | 5.2   | 0.000005 | 0.029665105 |

| Ly6C <sup>Lo</sup> up in HFD |       |             |             |
|------------------------------|-------|-------------|-------------|
|                              | logFC | p value     | FDR         |
| Gm1821                       | -6.1  | 0.000496872 | 0.483046771 |
| Gm13238                      | -4.5  | 0.000602217 | 0.493664509 |
| Krt7                         | -4.5  | 0.000977739 | 0.530699893 |
| Egfr                         | -3.6  | 0.003281357 | 0.999133332 |
| Ugt1a2                       | -3.4  | 0.005386876 | 1           |
| Gm11956                      | -3.4  | 0.00282438  | 0.985356972 |
| Gm26415                      | -3.2  | 0.002590899 | 0.980145091 |
| Lox                          | -3.2  | 0.008640524 | 1           |
| Adm                          | -3.2  | 0.0391392   | 1           |
| Rufy4                        | -3.0  | 0.019886325 | 1           |
| Tvp23a                       | -3.0  | 0.01230331  | 1           |
| Ska3                         | -2.9  | 0.007597023 | 1           |
| Gm37490                      | -2.9  | 0.010837675 | 1           |
| Gm45244                      | -2.8  | 0.051980692 | 1           |
| Sypc2                        | -2.8  | 0.028037552 | 1           |
| Col3a1                       | -2.8  | 0.009503922 | 1           |
| Gm25613                      | -2.8  | 0.002781079 | 0.985356972 |
| Gm43924                      | -2.8  | 0.00223108  | 0.928426824 |
| Gm5483                       | -2.8  | 0.018366815 | 1           |
| 4933433G15Rik                | -2.7  | 0.001209824 | 0.580901837 |
| Chil1                        | -2.7  | 0.019059383 | 1           |
| Gm22478                      | -2.7  | 0.056445751 | 1           |
| A730017L22Rik                | -2.6  | 0.003542641 | 1           |
| Il23a                        | -2.5  | 2.92E-06    | 0.029665105 |

| Ly6C <sup>Hi</sup> down in HFD |       |             |             |
|--------------------------------|-------|-------------|-------------|
|                                | logFC | p value     | FDR         |
| Cd163                          | 2.5   | 0.033831588 | 1           |
| Cd5l                           | 2.5   | 0.204814934 | 1           |
| Hbb-bs                         | 2.8   | 0.031606452 | 1           |
| Prg4                           | 3.0   | 0.000583966 | 0.560786763 |
| Cd300ld2                       | 3.2   | 0.004771237 | 1           |
| Lyve1                          | 3.6   | 0.061650162 | 1           |
| Sparc                          | 4.4   | 0.015034378 | 1           |
| Col3a1                         | 5.5   | 6.82E-06    | 0.028364945 |
| Col1a1                         | 5.6   | 1.37E-05    | 0.042774789 |
| Gm1821                         | 5.8   | 0.000777029 | 0.692888023 |

| Ly6C <sup>Hi</sup> up in HFD |       |             |             |
|------------------------------|-------|-------------|-------------|
|                              | logFC | p value     | FDR         |
| Ltf                          | -5.6  | 3.10E-06    | 0.025536425 |
| Krt7                         | -5.4  | 0.001084455 | 0.846146287 |
| Aox3                         | -5.4  | 0.031953751 | 1           |
| Gm37949                      | -5.3  | 0.00026188  | 0.412374168 |
| Gm17233                      | -5.0  | 0.012716922 | 1           |
| Gm43787                      | -4.5  | 0.006127952 | 1           |
| Gbp4                         | -4.2  | 0.000270884 | 0.412374168 |
| Cecr6                        | -4.0  | 0.010596233 | 1           |
| Ngp                          | -4.0  | 4.14E-05    | 0.103386371 |
| Grin3a                       | -3.9  | 0.017373863 | 1           |
| Boc                          | -3.9  | 0.003593002 | 1           |
| Gm10612                      | -3.7  | 0.013121808 | 1           |
| Gm14212                      | -3.7  | 0.00017858  | 0.371565154 |
| 9130230N09Rik                | -3.7  | 0.001776599 | 1           |
| Zfp229                       | -3.6  | 0.000992756 | 0.826237643 |
| Ms4a4b                       | -3.6  | 0.004683427 | 1           |
| Tktl1                        | -3.6  | 0.006588717 | 1           |
| Zfp760                       | -3.4  | 0.002508534 | 1           |
| Gm37745                      | -3.3  | 0.021465555 | 1           |
| Gm38020                      | -3.3  | 0.017924297 | 1           |
| Gm37655                      | -3.3  | 0.039229686 | 1           |
| Sgo1                         | -3.2  | 0.001601303 | 1           |
| Gm13785                      | -3.2  | 0.013531473 | 1           |
| Gm43961                      | -3.2  | 0.008867773 | 1           |
| Angptl3                      | -3.2  | 0.004600298 | 1           |
| Ugt1a6a                      | -3.1  | 0.006962539 | 1           |
| Gm23479                      | -3.1  | 0.014062972 | 1           |
| Capn11                       | -3.1  | 0.030575049 | 1           |
| Gm37706                      | -3.1  | 0.064605987 | 1           |
| AW146154                     | -3.0  | 0.004871876 | 1           |
| Lrrc63                       | -3.0  | 0.00029729  | 0.412374168 |
| A630072L19Rik                | -3.0  | 0.034535499 | 1           |
| Gm44237                      | -3.0  | 0.013400721 | 1           |
| Gm43145                      | -3.0  | 0.010217434 | 1           |
| Gm42701                      | -2.9  | 0.020805277 | 1           |
| Prr33                        | -2.9  | 0.019196396 | 1           |
| Gm13146                      | -2.9  | 0.013396669 | 1           |
| Gm26530                      | -2.9  | 0.052921919 | 1           |
| Hpgd                         | -2.8  | 0.019591682 | 1           |
| Gm14984                      | -2.7  | 0.006645571 | 1           |
| Gen1                         | -2.7  | 0.004783536 | 1           |
| Ptgs2os                      | -2.7  | 0.026641216 | 1           |
| Il12a                        | -2.6  | 0.033812844 | 1           |
| Cep72                        | -2.6  | 0.016313818 | 1           |
| Ppl                          | -2.6  | 0.009891927 | 1           |
| Mast4                        | -2.6  | 0.014963024 | 1           |
| Gm6542                       | -2.6  | 0.011599255 | 1           |
| Mest                         | -2.5  | 0.044752346 | 1           |
| BC035044                     | -2.5  | 0.09639372  | 1           |

Supplemental Table II.

Comparison was made between DIO and control wound Ly6C<sup>Hi</sup>[Live,Ly6G,CD11b<sup>+</sup>] and Ly6C<sup>Lo</sup>[Live, Ly6G<sup>-</sup>,CD11b<sup>+</sup>] cells. Differential gene expression was determined in edgeR using the common dispersion coefficient. Due to a low number of differentially expressed genes between groups, genes with a fold change of 2.5 or higher and p value of <0.05 are shown.
